# Supplementary material for: Surface modification of carbon nitride dots by nanoarchitectonics for better drug loading and higher cancer selectivity
Source: Royal Society of Chemistry journal article supplement (doi:10.1039/d2nr02063g), 2022-01-01

## Supporting Information

### **Surface Modification Nanoarchitectonics of Carbon Nitride Dots for Better Drug Loading and Higher Cancer Selectivity**

Emel Kirbas Cilingir, MS <sup>a</sup>, Meghana Sankaran BSc <sup>b</sup>, Jordan M. Garber <sup>a</sup>, Frederic Anthony  
Vallejo, BSc <sup>b, c</sup>, Mattia Bartoli, PhD <sup>d</sup>, Alberto Tagliaferro, PhD <sup>d</sup>, Steven Vanni, MD <sup>b, e, f</sup>,  
Regina M. Graham, PhD <sup>b, c, g, \*</sup> and Roger M. Leblanc, PhD <sup>a, \*</sup>

**Fig. S1. A)** AFM image, height profile of 1:3 CNDs, Scale = 1.62 nm. **B)** TEM image and histogram of 1:3 CNDs fitted with gaussian size distribution. Scale bar is 50 nm. ( $n > 100$ ). **C)** AFM image, height profile of 1:5 CNDs, Scale = 1.43 nm **D)** TEM image and histogram of 1:5 CNDs fitted with gaussian size distribution. Scale bar is 50 nm. ( $n > 100$ ).

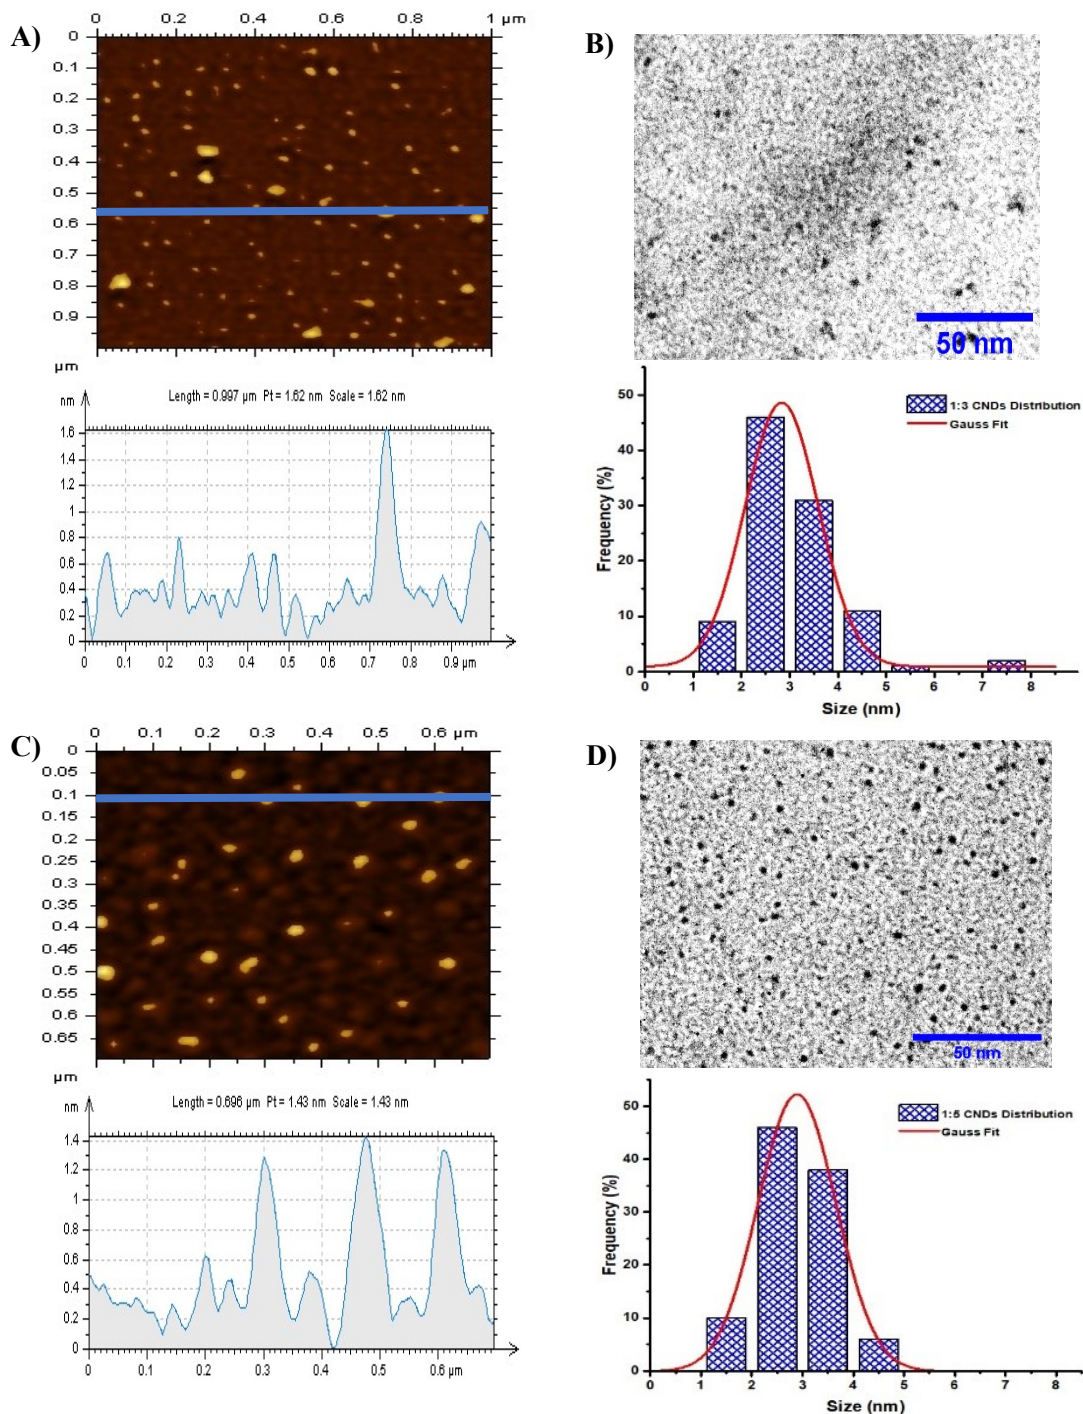

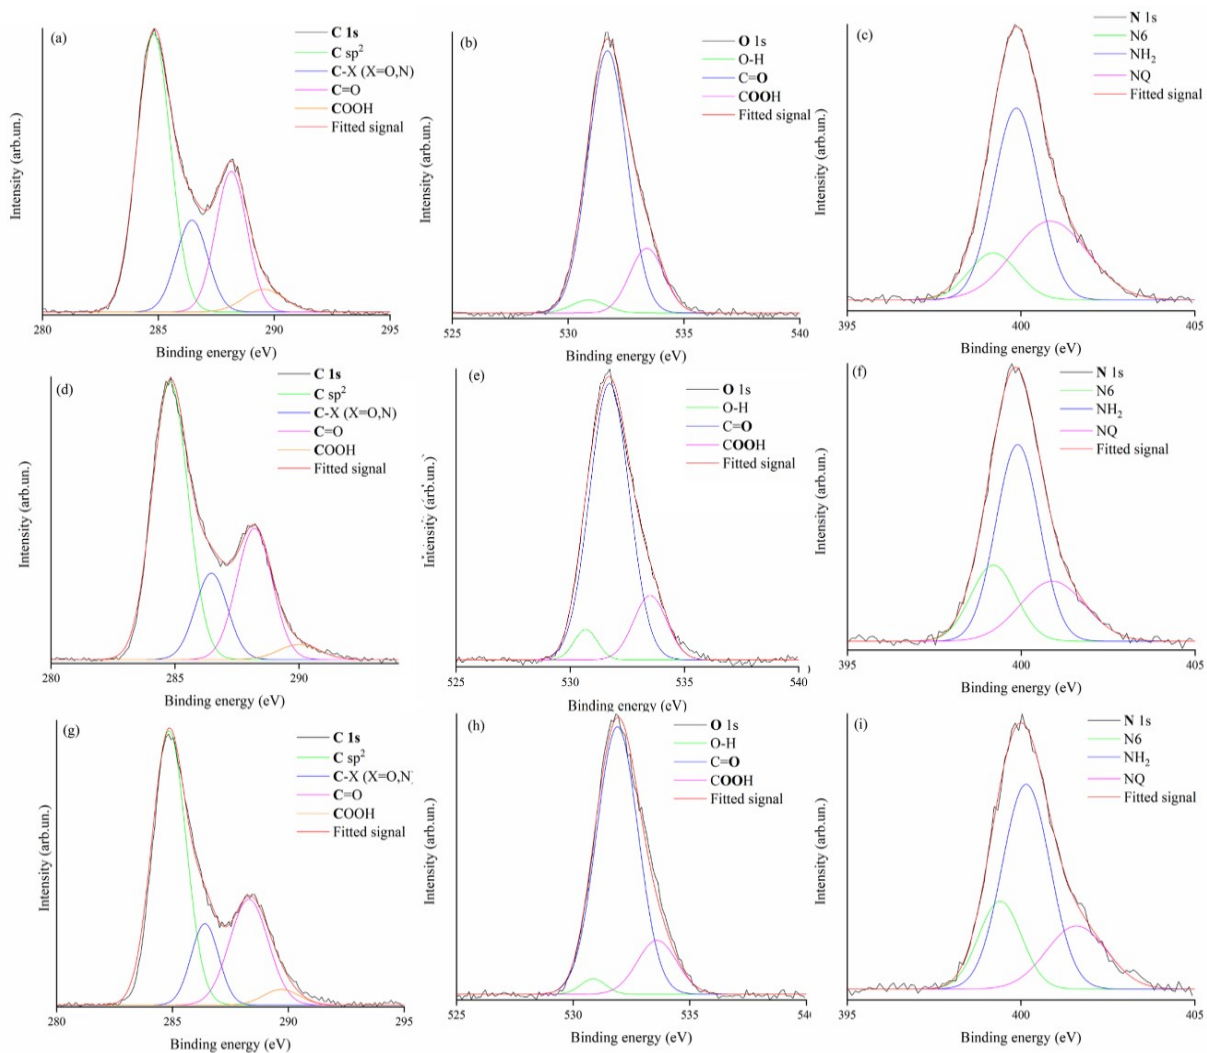

**Fig. S2.** XPS analysis of 1:1 (a, d, g), 1:3 (b, e, h) and 1:5 (c, f, i) CNDs.

**Fig. S3.** AFM images of surface modified CNDs after conjugation with doxorubicin A) 1:1 CNDs.

B) 1:3 CNDs. C) 1:5 CNDs

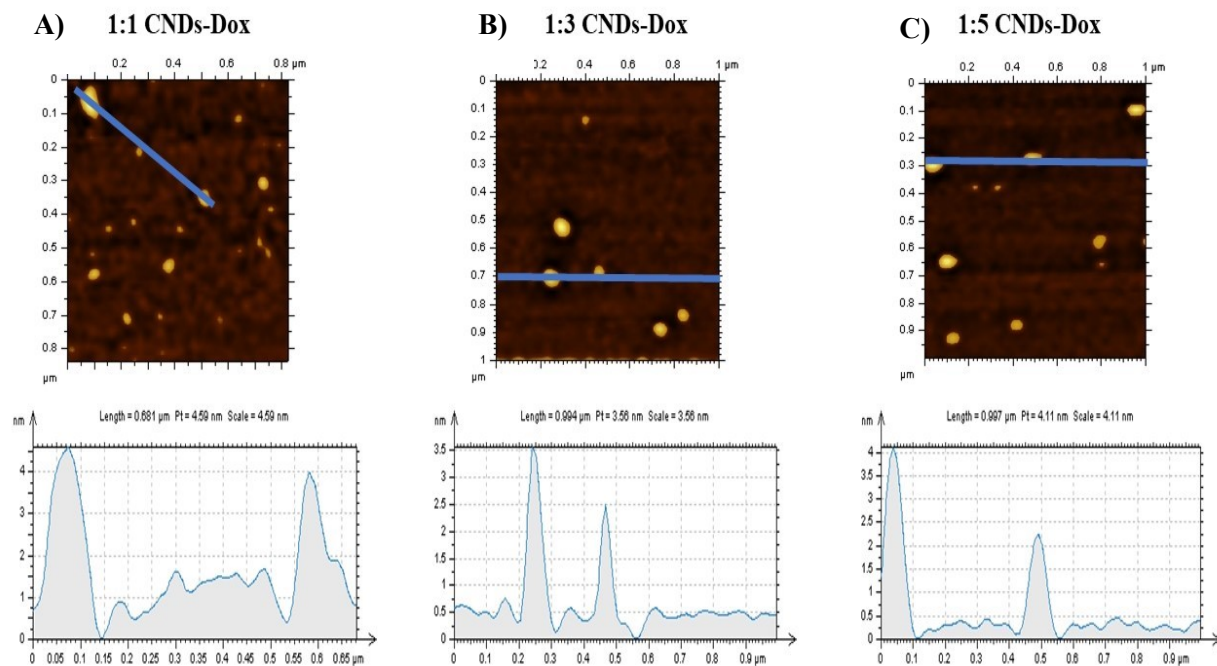

**Fig. S4.** A) Log graphs of 3-hour treatments for dose dependent inhibition from top to bottom; MSC, SJ-GBM2, KNS42, SMS-KCNR, NP53 and SF188 cell lines, respectively. B) Log graphs of 72-hour treatments for dose dependent inhibition from top to bottom; MSC, SJ-GBM2, KNS42, SMS-

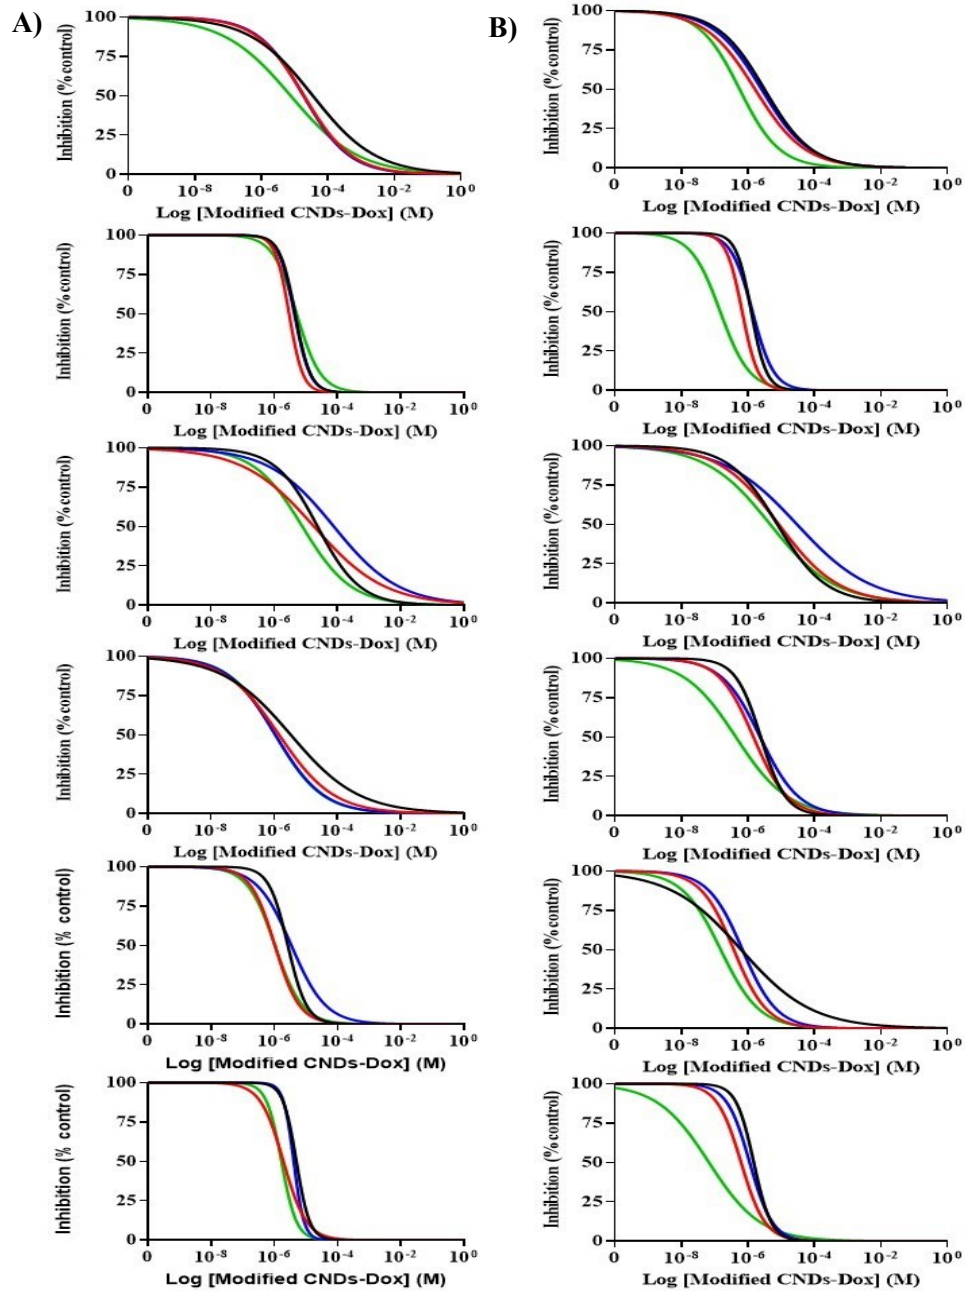

KCNR, NP53 and SF188 cell lines, respectively.

**Fig. S3. A)** Levels of ASCT2 and LAT1 transporters on cancer cell lines as determined by Western blot analysis. GAPDH blot is shown as a loading control. **B)** Schematic illustration for cell uptake of

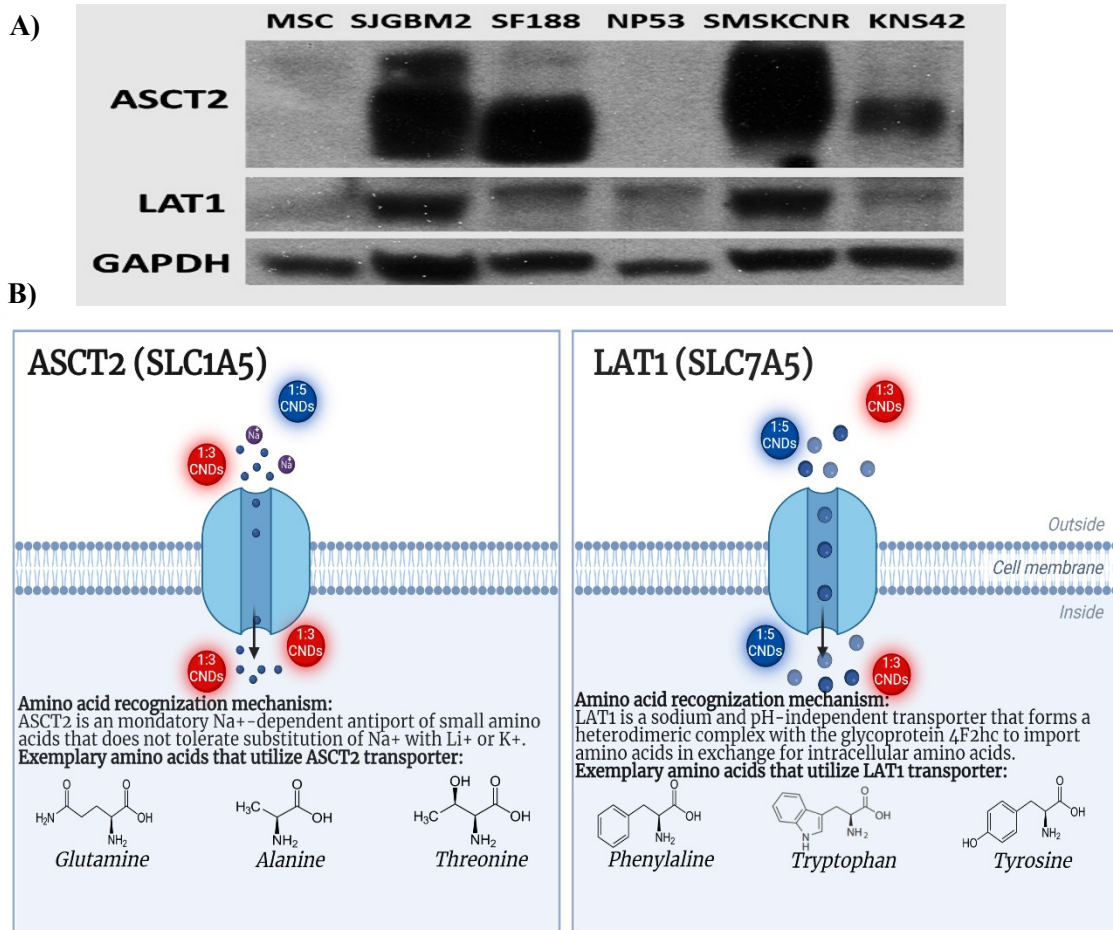

1:3 and 1:5 CNDs via ASCT2 and LAT1 transporters.

**Fig. S4.** Control group images of SJ-GBM2 (glioblastoma) cells treated with only 60mM of benser, 60mM of glutamine, 15 $\mu$ M of V-9302, 15mM of BCH, and 60mM of tryptophan for an hour. Scale bars are 50  $\mu$ m. Excitation wavelengths: Blue, 358nm, Green, 488 nm.

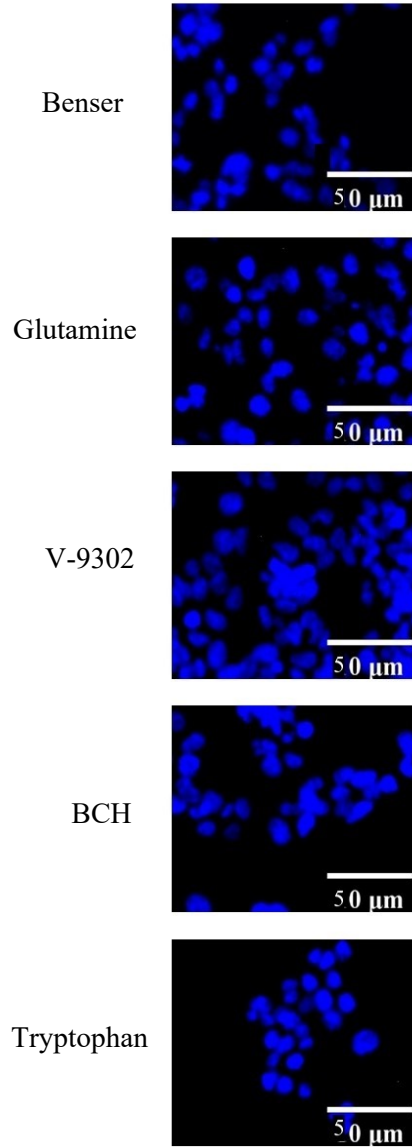

Supplement: d2nr02063g1.pdf [file d2nr02063g1.pdf]
